# Supplementary material for: Research motivators, barriers and progress of allied health clinicians engaged in an Allied Health Research Clinic. An observational study
Source: Research Square preprint supplement (doi:10.21203/rs.3.rs-6518500/v1), 2025-05-16
Supplement: Supplementary file 1 [file e4e2d20fcc659a0e6da8fc82.docx]

## Supplementary File 1

**Table 1: Stage of Current Research**

| **Research Stage** | **Selected (Yes/No)** |
| --- | --- |
| Writing a research report, presentation, or paper for publication |  |
| Writing a research protocol |  |
| Submitting an ethics application |  |
| Collecting data |  |
| Analysing qualitative research data |  |
| Analysing quantitative research data |  |
| Writing a literature review |  |
| Applying for research funding |  |
| Not currently involved with research |  |
| Other |  |

| **Table 2: Research Activities Completed in the Past 12 Months** | |
| --- | --- |
| **Activity** | **Completed (Yes/No)** |
| Secured research funding |  |
| Co-authored a paper for publication |  |
| Presented research findings at a conference |  |
| Submitted an ethics application |  |
| **Table 3: Perceived Barriers to Engagement in Research** | |
| **Barrier** | **Selected (Yes/No)** |
| Lack of time for research |  |
| Lack of suitable backfill |  |
| Other work roles taking priority |  |
| Lack of funds for research |  |
| Lack of support from management |  |
| Lack access to equipment for research |  |
| Lack of administrative support |  |
| Lack of software for research |  |
| Isolation |  |
| Lack of library/internet access |  |
| Not interested in research |  |
| Other personal commitments |  |
| Desire for work/life balance |  |
| Lack of a coordinated approach to research |  |
| Lack of skills for research |  |
| Intimidated by research language |  |
| Intimidated by the fear of getting it wrong |  |
| Difficulties in identifying a research question |  |

**Table 4: Motivators to Engage in Research**

| **Motivator** | **Selected (Yes/No)** |
| --- | --- |
| Develop skills |  |
| Career advancement |  |
| Increased job satisfaction |  |
| Dedicated time for research |  |
| Research written into role description |  |
| Colleagues doing research |  |
| Mentors available to supervise |  |
| Research encouraged by managers |  |
| Grant funds |  |
| Links to universities |  |
| Forms part of postgraduate study |  |
| Opportunities to participate at own level |  |
| Problem identified that needs changing |  |
| Desire to prove a theory/hunch |  |
| To keep the brain stimulated |  |
| Increased credibility |  |

## Supplementary File 2

|  |
| --- |
| Fig 1: Current involvement with research activity |

## Supplementary File 3

Multivariable logistic regression examining the association between motivators with gender and seniority

| Motivators | **Independent variable** | **Exp(B)** | **95% CI** | | **p value** |
| --- | --- | --- | --- | --- | --- |
| **LCI** | **UCI** |
| To develop skills | Gender | 1.48 | 0.16 | 31.89 | 0.749 |
|  | Seniority | 0.90 | 0.10 | 8.32 | 0.923 |
| Career advancement | Gender | 3.77 | 0.96 | 17.12 | **0.066** |
|  | Seniority | 0.38 | 0.10 | 1.37 | 0.146 |
| Increased job satisfaction | Gender | 2.49 | 0.67 | 10.03 | 0.180 |
|  | Seniority | 0.85 | 0.24 | 2.96 | 0.790 |
| Available scholarships | Gender | 0.75 | 0.03 | 9.18 | 0.826 |
|  | Seniority | UTD | UTD | UTD | UTD |
| Dedicated research time | Gender | 2.23 | 0.36 | 13.74 | 0.372 |
|  | Seniority | 4.06 | 0.73 | 33.26 | 0.133 |
| Research written into job description | Gender | 1.21 | 0.05 | 14.62 | 0.885 |
|  | Seniority | 2.52 | 0.22 | 57.95 | 0.472 |
| Colleagues doing research | Gender | 0.19 | 0.01 | 1.25 | 0.143 |
|  | Seniority | 0.74 | 0.15 | 3.43 | 0.701 |
| Mentors available | Gender | 0.88 | 0.22 | 3.32 | 0.853 |
|  | Seniority | 0.82 | 0.23 | 2.89 | 0.761 |
| Encouraged by managers | Gender | 1.06 | 0.26 | 4.05 | 0.934 |
|  | Seniority | 1.02 | 0.28 | 3.67 | 0.978 |
| Grant funds | Gender | 1.00 | 0.04 | 10.80 | 1.000 |
|  | Seniority | UTD | UTD | UTD | UTD |
| Links to universities | Gender | 9.75 | 2.18 | 55.96 | **0.005** |
|  | Seniority | 1.96 | 0.42 | 10.95 | 0.407 |
| Part of postgraduate study | Gender | 5.10 | 0.84 | 41.66 | **0.086** |
|  | Seniority | 0.66 | 0.08 | 4.25 | 0.663 |
| Opportunities to participate at own level | Gender | 0.86 | 0.20 | 3.43 | 0.828 |
|  | Seniority | 0.27 | 0.06 | 1.01 | **0.061** |
| Identified problem needs changing | Gender | 0.49 | 0.12 | 2.07 | 0.326 |
|  | Seniority | 4.05 | 0.98 | 21.18 | 0.067 |
| Desire to prove theory | Gender | 1.93 | 0.50 | 7.66 | 0.336 |
|  | Seniority | 0.35 | 0.09 | 1.24 | 0.111 |
| Stimulate brain | Gender | 3.22 | 0.81 | 14.79 | 0.108 |
|  | Seniority | 0.31 | 0.08 | 1.12 | **0.079** |
| Increased credibility | Gender | 1.28 | 0.30 | 5.17 | 0.729 |
|  | Seniority | 0.40 | 0.09 | 1.55 | 0.199 |
| *Referent = female and junior staff.*  *UTD = Unable to determine due to small proportion selecting as a motivator.* | | | | | |

## Supplementary File 4

Multivariable logistic regression examining the association between motivators with gender and seniority

| Barriers | **Independent variable** | **Exp(B)** | **95% CI** | | **p value** |
| --- | --- | --- | --- | --- | --- |
| **LCI** | **UCI** |
| Lack of time | Gender | 1.31 | 0.34 | 5.58 | 0.700 |
|  | Seniority | 2.87 | 0.79 | 11.58 | 0.119 |
| Lack of backfill | Gender | 2.30 | 0.51 | 11.00 | 0.276 |
|  | Seniority | 3.73 | 0.91 | 18.36 | 0.080 |
| Other work prioritised | Gender | 1.55 | 0.35 | 8.42 | 0.579 |
|  | Seniority | 1.86 | 0.46 | 8.53 | 0.394 |
| Lack of funds | Gender | 0.87 | 0.11 | 4.88 | 0.875 |
|  | Seniority | 1.63 | 0.31 | 9.48 | 0.560 |
| Lack of management support | Gender | UTD | UTD | UTD | UTD |
|  | Seniority | UTD | UTD | UTD | UTD |
| Lack of equipment | Gender | 0.95 | 0.04 | 11.09 | 0.967 |
|  | Seniority | 0.55 | 0.02 | 6.34 | 0.638 |
| Lack of admin support | Gender | 0.87 | 0.11 | 4.88 | 0.875 |
|  | Seniority | 1.63 | 0.31 | 9.48 | 0.560 |
| Lack of software | Gender | 0.32 | 0.02 | 2.37 | 0.333 |
|  | Seniority | 0.46 | 0.06 | 2.72 | 0.405 |
| Isolation | Gender | UTD | UTD | UTD | UTD |
|  | Seniority | UTD | UTD | UTD | UTD |
| Lack of library and internet | Gender | 1.63 | 0.06 | 45.10 | 0.744 |
|  | Seniority | UTD | UTD | UTD | UTD |
| Not interested | Gender | 1.21 | 0.05 | 14.62 | 0.885 |
|  | Seniority | 2.51 | 0.22 | 57.95 | 0.472 |
| Other personal commitments | Gender | 11.31 | 1.43 | 240.16 | 0.042 |
|  | Seniority | 1.06 | 0.11 | 8.72 | 0.954 |
| Desire for work-life balance | Gender | 5.15 | 1.15 | 26.89 | 0.038 |
|  | Seniority | 1.62 | 0.35 | 8.24 | 0.541 |
| Lack of coordinated approach | Gender | 1.64 | 0.32 | 7.87 | 0.536 |
|  | Seniority | 0.27 | 0.04 | 1.34 | 0.137 |
| Lack of research skills | Gender | 0.95 | 0.25 | 3.65 | 0.935 |
|  | Seniority | 0.43 | 0.12 | 1.48 | 0.188 |
| Intimidated by research language | Gender | 2.08 | 0.53 | 8.37 | 0.291 |
|  | Seniority | 1.38 | 0.37 | 5.34 | 0.631 |
| Fear of getting it wrong | Gender | 0.93 | 0.20 | 3.86 | 0.923 |
|  | Seniority | 0.46 | 0.10 | 1.83 | 0.285 |
| Identifying the research question | Gender | 0.36 | 0.05 | 1.82 | 0.255 |
|  | Seniority | 0.35 | 0.06 | 1.53 | 0.181 |
| *Referent = female and junior staff.*  *UTD = Unable to determine due to small proportion selecting as a motivator.* | | | | | |
